# Supplementary material for: A facilely synthesized amino-functionalized metal–organic framework for highly specific and efficient enrichment of glycopeptides
Source: Royal Society of Chemistry journal article supplement (doi:10.1039/c4cc05179c), 2014-01-01
Supplement: c4cc05179c1.pdf [file c4cc05179c1.pdf]

## Electronic Supplementary Information

### **A Facilely Synthesized Amino-functionalized Metal-organic Framework for Highly Specific and Efficient Enrichment of Glycopeptides**

Yi-Wei Zhang, Ze Li, Qiang Zhao, Ying-Lin Zhou, Hu-Wei Liu and Xin-Xiang Zhang\*

*Beijing National Laboratory for Molecular Sciences (BNLMS), MOE Key Laboratory of Bioorganic Chemistry and Molecular Engineering, College of Chemistry, Peking University, Beijing 100871, P.R. China*

#### **Experimental Section**

##### **Chemicals and Materials**

Horseshoe peroxidase (HRP), bovine serum albumin (BSA), and 2, 5-dihydroxyl benzoic acid (DHB), dithiothreitol (DTT) were purchased from sigma-Aldrich (St. Louis, MO, USA). Secreted form mouse IgG (anti- $\alpha$ -fetoprotein (AFP) monoclonal) was obtained from Biocell CO. LTD (Zhengzhou, China). 2-aminoterephthalic acid and iodoacetamide (IAA) were from Alfa Aesar China Chemical Co., Ltd. (Tianjin, China). Sequencing grade modified trypsin was purchased from Promega. Peptide-N-glycosidase (PNGase F) was from New England Biolabs (Ipswich, MA, USA). HPLC grade methanol and acetonitrile (ACN) were from Fisher Scientific (Fair Lawn, NJ, USA). Formic acid (FA) was from TCI (Tokyo, Japan). Chromic nitrate hydrate, urea, ammonium bicarbonate ( $\text{NH}_4\text{HCO}_3$ ) and other analytical grade reagents were obtained from Beijing Chemicals (Beijing, China). Water was purified by Milli-Q pure water system (Millipore, Bedford, MA, USA).

##### **Synthesis of MIL-101(Cr)-NH<sub>2</sub>**

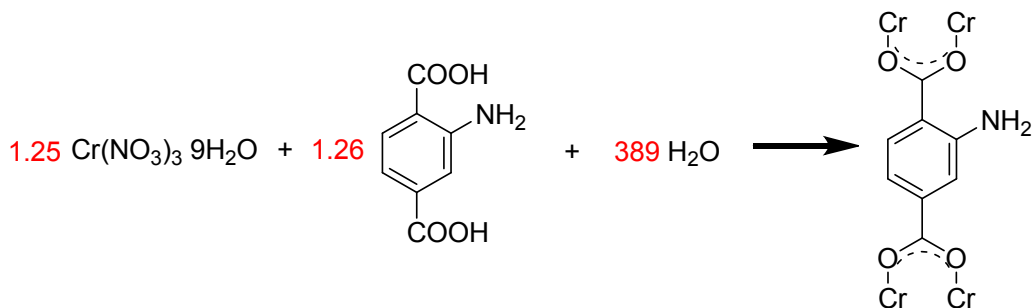

### Scheme S1 Synthesis of MIL-101(Cr)-NH<sub>2</sub>

MIL-101(Cr)-NH<sub>2</sub> was synthesized according to *Jiang et al.*<sup>S1</sup> with a little modifications. Scheme S1 was schematic representation of the synthesis procedure. In detail, chromic nitrate hydrate (500 mg, 1.25 mmol) and 2-aminoterephthalic acid (230 mg, 1.26 mmol) were dispersed in deionized water (7 mL, 389 mmol). After stirred for 3 h at room temperature, the suspension was heated under autogeneous pressure in a Teflon-lined stainless steel autoclave at 130 °C for 24 h. The autoclave then cooled down to room temperature. The resulting green precipitate was collected by centrifugation and washed with ethanol for five times to remove the excess reagents, followed by drying at 80 °C.

### Characterization

Fourier-transformed infrared spectroscopy (FT-IR) characterization was performed on a Bruker VERTEX 70/70v FT-IR spectrometer to confirm the existence of 2-aminoterephthalic acid (NH<sub>2</sub>bdc) skeleton in the structure. In the FT-IR spectrum (Fig. S1), the double peaks at 3421 cm<sup>-1</sup> and 3384 cm<sup>-1</sup> ascribed to the asymmetrical and symmetrical stretching vibration absorption of the amine groups. The peak at 1582 cm<sup>-1</sup> corresponded to the N-H bending vibration while the 1338 cm<sup>-1</sup> and 1257 cm<sup>-1</sup> peaks represented for C-N stretching of aromatic amines. The peaks at 1499 cm<sup>-1</sup> and 1430 cm<sup>-1</sup> illustrated the -(O-C-O)- stretching vibration in the MIL-101(Cr)-NH<sub>2</sub> skeleton. X-ray diffraction (XRD) pattern of the dried powders was carried out on a Rigaku

D/MAX-PC 2500 diffractometer with monochromatic Cu K $\alpha$  radiation ( $\lambda = 1.5406 \text{ \AA}$ ) at an accelerating potential of 40 kV and a tube current of 300 mA. Powder XRD (Fig. S2) indicated that the resulting powder was a typical MIL-101(Cr) structure with a pattern similar to the simulated. The rather broad Bragg reflections were consequence of the small particle sizes, as supported by transmission electron microscopy (TEM) images (Fig. S3), which revealed the uniform and narrow size distribution of particles with about 25 nm. The TEM images were taken on a FEI Tecnai G2 T20 transmission electron microscope. Thermal stability was measured on a simultaneous thermal analysis apparatus (Q600SDT TGA-DTA-DSC) in air at a heat rate of 5 °C / min up to 800 °C. Thermogravimetric analysis showed the nanoparticles were stable up to 260 °C (Fig. S4). The nitrogen adsorption-desorption isotherm was recorded by ASAP 2020M apparatus at 77.2 K. The range of relative pressures was between 0 and 1. The BET surface area was calculated over the range of relative pressures between 0.05 and 0.20. N<sub>2</sub> adsorption experiment illustrates the amazing BET surface area of 2187.4 m<sup>2</sup>/g and Langmuir surface area of 3129.0 m<sup>2</sup>/g. The sharp uptake under low pressure ( $P/P_0=10^{-5}$  to 0.1) in N<sub>2</sub> adsorption-desorption isotherms (Fig. S5) demonstrated the microporous feature of the material while another uptake occurred near  $P/P_0=1.0$  attributed to the textural pores created by nanoparticles aggregation.

### **Preparation of protein digests**

Glycoproteins were dissolved in 50 mM NH<sub>4</sub>HCO<sub>3</sub> solution (HRP 2 mg/mL and IgG 4 mg/mL, respectively.) and denatured by adding 8 M urea, 10 mM DTT for 45 min at 60 °C. Then 100 mM IAA was added and reacted at 37°C for 45 min in dark. The solution was diluted until the urea concentration reached 0.8 M and treated with trypsin at 37°C (enzyme/protein ratio of 1:20

for HRP and enzyme/protein ratio of 1:25 for IgG) for 18 h. The tryptic digests were stored at -20 °C before use.

### **Enrichment of glycopeptides**

MIL-101(Cr)-NH<sub>2</sub> was dispersed in ACN contain 0.1% FA. Then 10 μL tryptic digest of HRP (50 pmol) or IgG (200 pmol) was added into 90 μL 5 mg/mL MIL-101(Cr)-NH<sub>2</sub> suspension and shaken at room temperature for 5 min. After capture, the slurry was centrifuged at 10000 rpm for 3 min to remove the suspensions. Then the MOFs were washed twice with 80% ACN containing 1% H<sub>3</sub>PO<sub>4</sub> to remove the most non-glycopeptides. Finally, 30 μL 30% ACN containing 0.1% FA were added to elute the glycopeptides and collected for analysis by matrix-assisted laser desorption/ionization time-of-flight mass spectrometry (MALDI-TOF-MS).

### **Deglycosylation of N-linked glycopeptides by PNGase F**

The eluted glycopeptides after enrichment were dissolved in 17 μL deionized water, followed by 2 μL 10×G7 Reaction Buffer and 1 μL PNGase F added to the solution then incubated at 37 °C for 18 h. The reaction solutions were directly spotted on the target plate for MALDI-TOF-MS analysis or analysis by LC-MS/MS.

### **Mass spectrometry analysis**

#### **MALDI-TOF-MS Analysis**

A mixture of 30 mg/mL DHB in 50% (v/v) ACN was prepared as the matrix. Then, 1 μL aliquot of the eluate and 1 μL matrix solution were sequentially dropped onto the ground steel plate, dried at room temperature for MS analysis. All MALDI-MS spectra were acquired in reflection

and positive mode on an Ultraflex MALDI TOF/TOF mass spectrometer (Bruker Daltonics, Bremen, Germany), equipped with pulsed-nitrogen laser (337 nm). The accelerating voltage was set at 25 kV, 70 ns extraction delay. Laser fluence was optimized at 20%. Each mass spectrum was generated by an average of 400 laser shots.

### **LC-MS/MS Analysis**

All LC-MS/MS analyses were performed on a Thermo Q-Exactive Orbitrap mass spectrometer with a Thermo Ultimate 3000 UHPLC (Thermo, San Jose, CA, USA). The deglycosylated glycopeptides were loaded on a C18 column. For a gradient separation, H<sub>2</sub>O/FA (99.9:0.1) was used as the mobile phase A while ACN/FA (99.9:0.1) was mobile phase B. At first, 5 % B was hold for 10 min, then from 5% to 35% for 120 min, from 35% to 80% for 10 min and held at 80% for 6 min. The flow rate was 0.2 mL/min. Full mass scan was acquired from 300 to 2000 m/z with resolution 70000 at R=400 m/z. The MS/MS spectra were obtained in data-dependent ddMS<sup>2</sup> mode.

### **Database search and data analysis**

The LC-MS/MS raw file was searched against the Swiss-Prot database using MASCOT software (version 2.3.02). The search parameters were set as follows: fixed modification of cysteine residues (+57 Da), variable modification of methionine oxidation (+16 Da), N-terminal acetylation, and deamidation (N), at most two missed tryptic cleavage sites, 20 ppm error tolerance in MS and 0.1 Da error tolerance in MS/MS. The resulting data files were exported with the cut off set to 0.05. According to the consensus N-X-S/T (X≠P) sequon of N-

glycosylation, the remaining peptide sequences were additionally filtered to remove non-motif containing peptides.

## Results

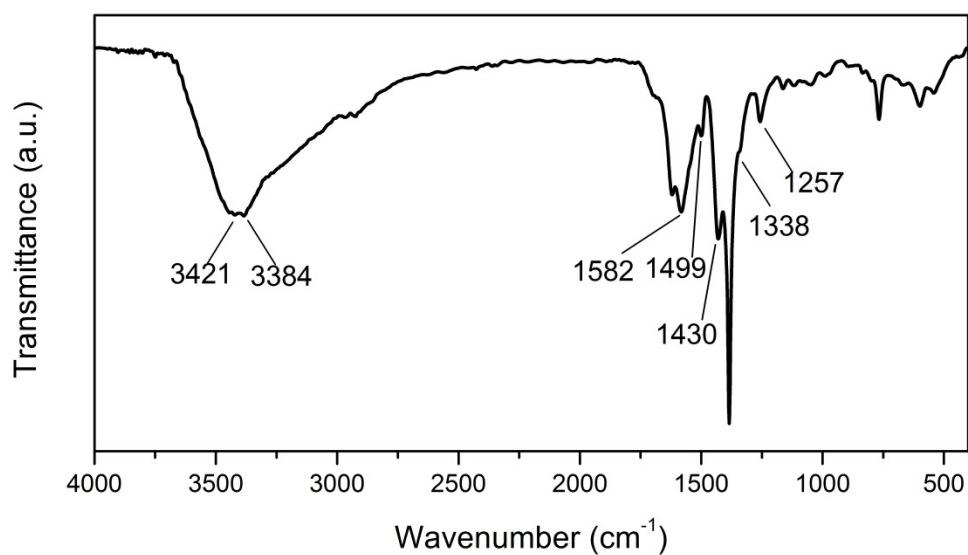

**Figure S1** FT-IR spectrum of the MIL-101(Cr)-NH<sub>2</sub>

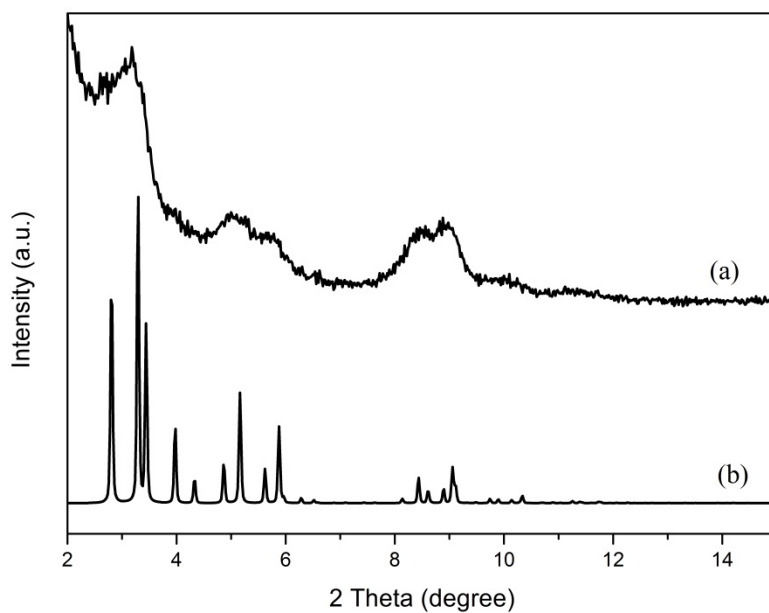

**Figure S2** Powder XRD pattern of MIL-101(Cr)-NH<sub>2</sub> (a) and the simulated PXRD pattern calculated from the MIL-101(Cr) crystal structure (b)

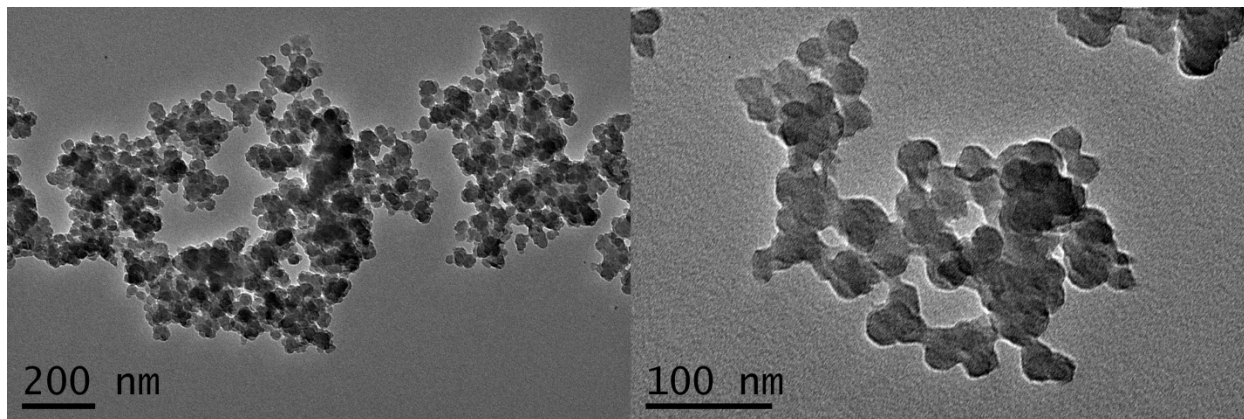

**Figure S3** TEM images of MIL-101(Cr)-NH<sub>2</sub>

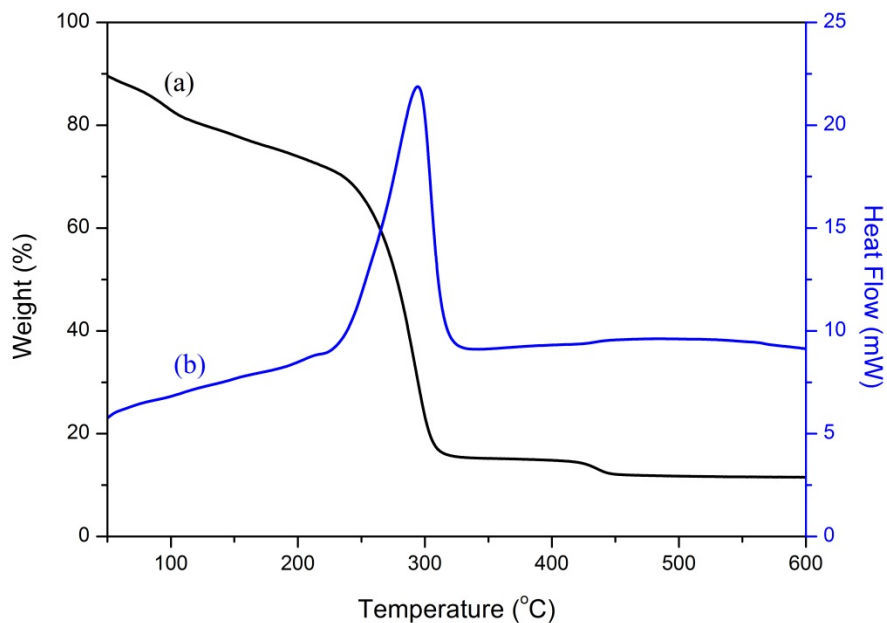

**Figure S4** The thermogravimetric curve (a) and differential thermal analysis spectrum (b) for MIL-101(Cr)-NH<sub>2</sub> powder. TG curve showed the start decomposition temperature was about 260 °C. The sharp endothermic peak 300 °C in heat flow spectrum was due to the rapid decomposition of the resulting powders.

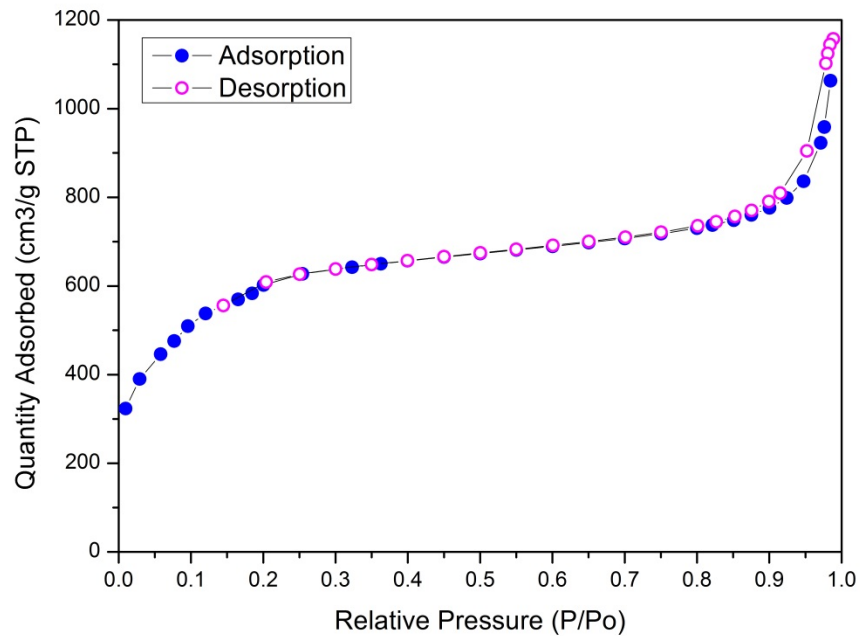

**Figure S5** N<sub>2</sub> adsorption-desorption isotherms at 77.2 K

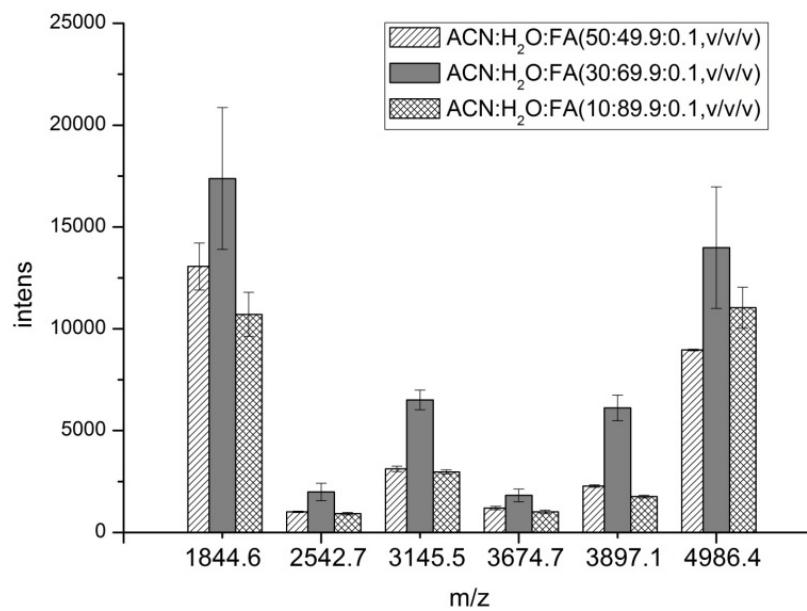

**Figure S6** The influence of final acetonitrile concentration on peak intensity of six chosen glycopeptides enriched by MIL-101(Cr)-NH<sub>2</sub>; Sample: HRP tryptic digests, 1.0 pmol/μL



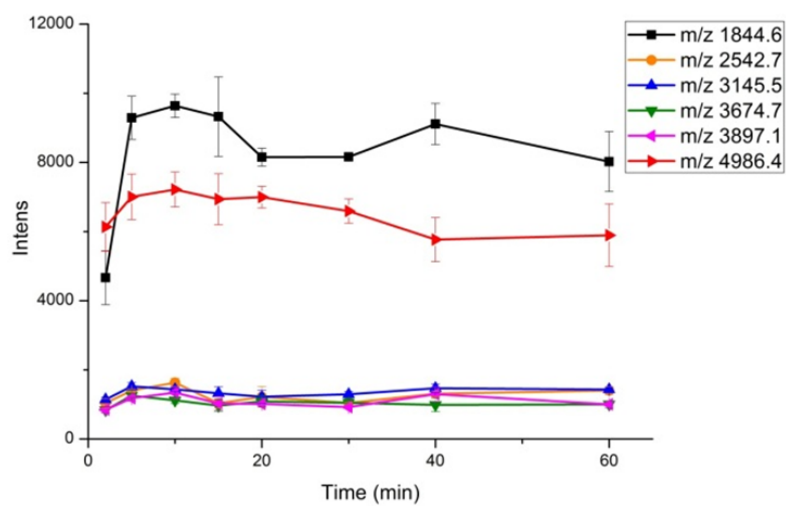

**Figure S7** The influence of incubation time on peak intensity of six chosen glycopeptides enriched by MIL-101(Cr)-NH<sub>2</sub>; Sample: HRP tryptic digests, 1.0 pmol/μL

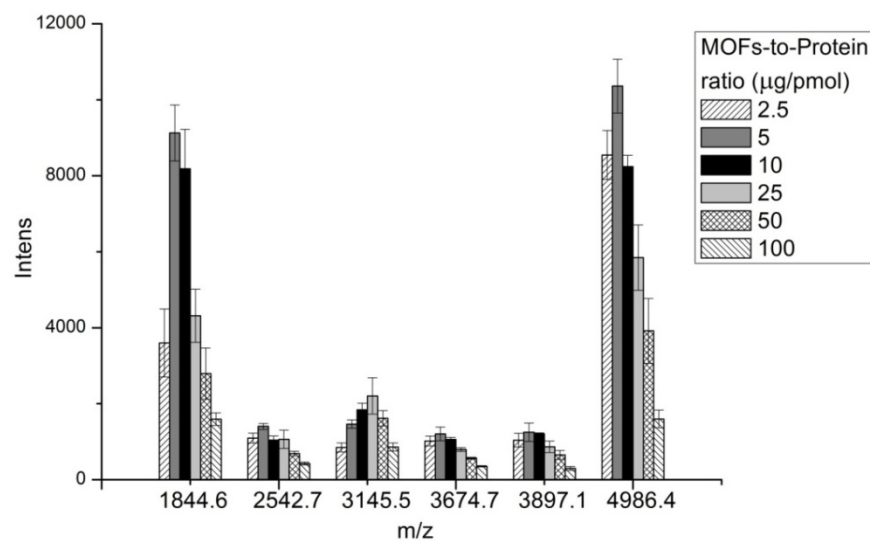

**Figure S8** The influence of MOFs-to-protein ratio on peak intensity of six chosen glycopeptides enriched by MIL-101(Cr)-NH<sub>2</sub>; Sample: HRP tryptic digests, 1.0 pmol/μL

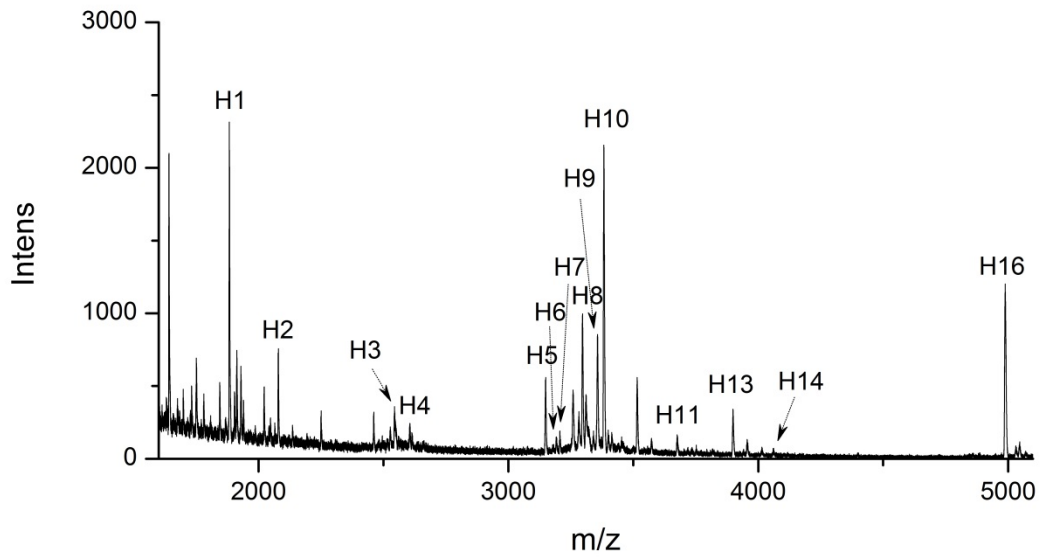

**Figure S9** MALDI-TOF-MS spectra of the mixture of HRP (1.0 pmol/ $\mu$ L) and BSA tryptic digests (10.0 pmol/ $\mu$ L) after enriching and sequenced washing

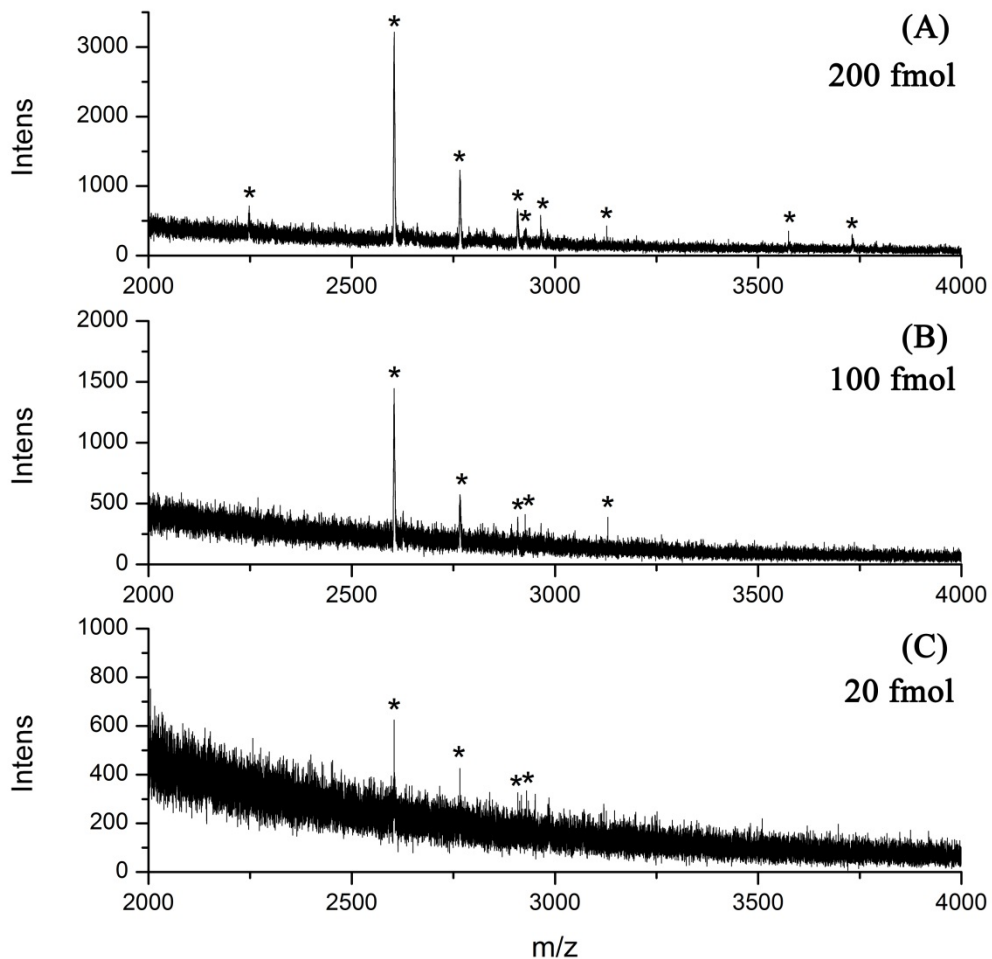

**Figure S10** MALDI-TOF-MS spectra of IgG tryptic digest after enrichment by MIL-101(Cr)-NH<sub>2</sub> (A) 200 fmol (1  $\mu$ L), (B) 100 fmol (1  $\mu$ L), (C) 20 fmol (1  $\mu$ L), \* denotes glycopeptides

**Table S1** Observed glycopeptides and glycan structures of mouse IgG tryptic digests enriched by MIL-101(Cr)-NH<sub>2</sub>. Hex, HexNAc, Fuc and NeuAc are the abbreviations of hexose, N-acetylhexosamine, fucose and N-acetylneuraminic acid, respectively. N# denotes the N-linked glycosylation sites

| Peak Number | Observed m/z | Theoretic glycan | Glycan structure | Peptide sequence |
|-------------|--------------|------------------|------------------|------------------|
|-------------|--------------|------------------|------------------|------------------|

|     |        | mass   |                                |            |
|-----|--------|--------|--------------------------------|------------|
| I1  | 2251.5 | 1113.4 | [Hex]3[HexNAc]3                | EEQFN#STFR |
| I2  | 2374.0 | 1234.4 | [Hex]5[HexNAc]2                | EEQFN#STFR |
| I3  | 2401.1 | 1259.5 | [Hex]3[HexNAc]3[Fuc]1          | EEQFN#STFR |
| I4  | 2415.8 | 1275.5 | [Hex]4[HexNAc]3                | EEQFN#STFR |
| I5  | 2457.2 | 1316.5 | [Hex]3[HexNAc]4                | EEQFN#STFR |
| I6  | 2603.4 | 1462.5 | [Hex]3[HexNAc]4[Fuc]1          | EEQFN#STFR |
| I7  | 2619.6 | 1478.5 | [Hex]4[HexNAc]4                | EEQFN#STFR |
| I8  | 2659.6 | 1519.6 | [Hex]3[HexNAc]5                | EEQFN#STFR |
| I9  | 2765.0 | 1624.6 | [Hex]4[HexNAc]4[Fuc]1          | EEQFN#STFR |
| I10 | 2821.7 | 1681.6 | [Hex]4[HexNAc]5                | EEQFN#STFR |
| I11 | 2908.8 | 1769.6 | [Hex]4[HexNAc]4[NeuAc]1        | EEQFN#STFR |
| I12 | 2926.7 | 1786.7 | [Hex]5[HexNAc]4[Fuc]1          | EEQFN#STFR |
| I13 | 2965.4 | 1827.7 | [Hex]4[HexNAc]5[Fuc]1          | EEQFN#STFR |
| I14 | 2982.8 | 1843.7 | [Hex]5[HexNAc]5                | EEQFN#STFR |
| I15 | 3063.1 | 1915.7 | [Hex]4[HexNAc]4[Fuc]1[NeuAc]1  | EEQFN#STFR |
| I16 | 3126.1 | 1989.7 | [Hex]5[HexNAc]5[Fuc]1          | EEQFN#STFR |
| I17 | 3461.5 | 2321.9 | [Hex]4[HexNAc]6[Fuc]1[NeuAc]1  | EEQFN#STFR |
| I18 | 3508.6 | 2368.8 | [Hex]5[HexNAc]4[Fuc]1[NeuAc]2  | EEQFN#STFR |
| I19 | 3580.5 | 2442.9 | [Hex]6[HexNAc]5[Fuc]1[NeuAc]1  | EEQFN#STFR |
| I20 | 3730.2 | 2587.9 | [Hex]5[HexNAc]5[NeuAc]2        | EEQFN#STFR |
| I21 | 3786.6 | 2646.0 | [Hex]6[HexNAc]6[Fuc]1[NeuAc]1  | EEQFN#STFR |
| I22 | 3824.4 | 2684.9 | [Hex]10[HexNAc]3[Fuc]1[NeuAc]1 | EEQFN#STFR |

**Table S2** Observed glycopeptides and glycan structures of HRP tryptic digests enriched by MIL-101(Cr)-NH<sub>2</sub>. Hex, HexNAc, Fuc and Xyl are the abbreviations of hexose, N-acetylhexosamine, fucose and xylose, respectively. *N#* denotes the N-linked glycosylation sites

| Peak Number | Observed m/z | Theoretic glycan mass | Glycan structure            | Peptide sequence                                      |
|-------------|--------------|-----------------------|-----------------------------|-------------------------------------------------------|
| H1          | 1844.6       | 1188.4                | [Hex]3[HexNAc]2[Fuc]1[Xyl]1 | <sup>184</sup> NVGLN#R <sup>189</sup>                 |
| H2          | 2069.5       | 1188.4                | [Hex]3[HexNAc]2[Fuc]1[Xyl]1 | <sup>42</sup> PNVSN#IVR <sup>49</sup>                 |
| H3          | 2542.7       | 1188.4                | [Hex]3[HexNAc]2[Fuc]1[Xyl]1 | <sup>282</sup> SSPN#ATDTIPLVR <sup>294</sup>          |
| H4          | 2613.1       | 1188.4                | [Hex]3[HexNAc]2[Fuc]1[Xyl]1 | <sup>225</sup> PTLN#TTYLQTLR <sup>236</sup>           |
| H5          | 3145.5       | 1188.4                | [Hex]3[HexNAc]2[Fuc]1[Xyl]1 | <sup>237</sup> GLCPLNGN#LSALVDFDLR <sup>254</sup>     |
| H6          | 3190.2       | 367.1                 | [HexNAc]1[Fuc]1             | <sup>69</sup> LHFHDCFVNGCDASILLDN#TTSFR <sup>92</sup> |
| H7          | 3206.7       | 1042.4                | [Hex]3[HexNAc]2[Xyl]1       | <sup>295</sup> SFAN#STQTFNFVVEAMDR <sup>313</sup>     |
| H8          | 3338.9       | 1188.4                | [Hex]3[HexNAc]2[Fuc]1[Xyl]1 | <sup>31</sup> QLTPTFYDNSCPN#VSNIVR <sup>49</sup>      |

|     |        |        |                             |                                                                     |
|-----|--------|--------|-----------------------------|---------------------------------------------------------------------|
| H9  | 3353.3 | 1188.4 | [Hex]3[HexNAc]2[Fuc]1[Xyl]1 | <sup>295</sup> SFAN#STQTFNFAFVEAMDR <sup>313</sup>                  |
| H10 | 3387.6 | 2226.8 | [Hex]6[HexNAc]4[Fuc]2[Xyl]1 | <sup>180</sup> DSFRNVGLN#R <sup>189</sup>                           |
| H11 | 3675.7 | 1188.4 | [Hex]3[HexNAc]2[Fuc]1[Xyl]1 | <sup>272</sup> GLIQSDQELFSSP#ATDTIPLVR <sup>294</sup>               |
| H12 | 3752.2 | 1042.4 | [Hex]3[HexNAc]2[Xyl]1       | <sup>69</sup> LHFHDCFVNGCDASILLDN#TTSFRTEK <sup>95</sup>            |
| H13 | 3897.1 | 1188.4 | [Hex]3[HexNAc]2[Fuc]1[Xyl]1 | <sup>69</sup> LHFHDCFVNGCDASILLDN#TTSFRTEK <sup>95</sup>            |
| H14 | 4059.7 | 1042.4 | [Hex]3[HexNAc]2[Xyl]1       | <sup>31</sup> QLTPTFYDNSC(AAVESACPR)P#VSNIV<br>R <sup>49</sup> -H2O |
| H15 | 4840.8 | 1188.4 | [Hex]3[HexNAc]2[Fuc]1[Xyl]1 | <sup>214</sup> LYN#FSNTGLPDPTLN#TTYLQTLR <sup>236</sup>             |
|     |        | 1042.4 | [Hex]3[HexNAc]2[Xyl]1       |                                                                     |
| H16 | 4987.8 | 1188.4 | [Hex]3[HexNAc]2[Fuc]1[Xyl]1 | <sup>214</sup> LYN#FSNTGLPDPTLN#TTYLQTLR <sup>236</sup>             |
|     |        | 1188.4 | [Hex]3[HexNAc]2[Fuc]1[Xyl]1 |                                                                     |

**Table S3** Observed glycopeptides of human serum tryptic digests enriched by MIL-101(Cr)-NH<sub>2</sub>.

OS=OrganismName, GN=GeneName, PE=ProteinExistence, SV=SequenceVersion. N denotes the N-linked glycosylation sites

| Protein Accession Number | Protein Description                                           | Peptide Sequence                                |
|--------------------------|---------------------------------------------------------------|-------------------------------------------------|
| A1AG1_HUMAN              | Alpha-1-acid glycoprotein 1 OS=Homo sapiens GN=ORM1 PE=1 SV=1 | WFYIASAFRNEEY <u>N</u> K                        |
| A1AG1_HUMAN              | Alpha-1-acid glycoprotein 1 OS=Homo sapiens GN=ORM1 PE=1 SV=1 | QDQCIYNTTYLNVQRENGTISR                          |
| A1AT_HUMAN               | Alpha-1-antitrypsin OS=Homo sapiens GN=SERPINA1 PE=1 SV=3     | YLG <u>N</u> ATAIFFLPDEGK                       |
| A1AT_HUMAN               | Alpha-1-antitrypsin OS=Homo sapiens GN=SERPINA1 PE=1 SV=3     | QLAHQSNSTNIFFSPVSIATAFAMLSLGTK                  |
| A1AT_HUMAN               | Alpha-1-antitrypsin OS=Homo sapiens GN=SERPINA1 PE=1 SV=3     | KLSSWVLLMKYLG <u>N</u> ATAIFFLPDEGK             |
| A1BG_HUMAN               | Alpha-1B-glycoprotein OS=Homo sapiens GN=A1BG PE=1 SV=3       | PLAN <u>V</u> TLTCQAHLETPDFQLFK                 |
| A1BG_HUMAN               | Alpha-1B-glycoprotein OS=Homo sapiens GN=A1BG PE=1 SV=3       | EGDHEFLEVPEAQEDVEATFPVHQPGNYSCSYR               |
| A2MG_HUMAN               | Alpha-2-macroglobulin OS=Homo sapiens GN=A2M PE=1 SV=2        | TEVSSNHVLIYLDKVS <u>N</u> QTLSLFFTVLQDVPVR      |
| A2MG_HUMAN               | Alpha-2-macroglobulin OS=Homo sapiens GN=A2M PE=1 SV=2        | SNHVSRTVSSNHVLIYLDKVS <u>N</u> QTLSLFFTVLQDVPVR |
| A2MG_HUMAN               | Alpha-2-macroglobulin OS=Homo sapiens GN=A2M PE=1 SV=2        | GCVLLSYLNETVTVSASLESVR                          |
| A2MG_HUMAN               | Alpha-2-macroglobulin OS=Homo sapiens GN=A2M PE=1 SV=2        | GCVLLSYLNETVTVSASLESVRGN                        |
| A2MG_HUMAN               | Alpha-2-macroglobulin OS=Homo sapiens GN=A2M PE=1 SV=2        | VIFIRGNEANYYSNATTDEHGLVQFSINTTNVMGTSLSLTVR      |
| A2MG_HUMAN               | Alpha-2-macroglobulin OS=Homo sapiens GN=A2M PE=1 SV=2        | VSNQTLSLFFTVLQDVPVR                             |

|             |                                                                                         |                                       |
|-------------|-----------------------------------------------------------------------------------------|---------------------------------------|
| A2MG_HUMAN  | Alpha-2-macroglobulin OS=Homo sapiens GN=A2M PE=1 SV=2                                  | GNEANYYSNATTDEHGLVQFSINTTNVMGTSLSLTVR |
| AACT_HUMAN  | Alpha-1-antichymotrypsin OS=Homo sapiens GN=SERPINA3 PE=1 SV=2                          | YTGNASALFILPDQDK                      |
| AACT_HUMAN  | Alpha-1-antichymotrypsin OS=Homo sapiens GN=SERPINA3 PE=1 SV=2                          | NVIFSPLSISTALAFSLGAHN<br>TTLTEILK     |
| AACT_HUMAN  | Alpha-1-antichymotrypsin OS=Homo sapiens GN=SERPINA3 PE=1 SV=2                          | FNLTETSEAEIHQSFQHLLR                  |
| AACT_HUMAN  | Alpha-1-antichymotrypsin OS=Homo sapiens GN=SERPINA3 PE=1 SV=2                          | TLNQSSDELQLSMGNAMFVK                  |
| AFAM_HUMAN  | Afamin OS=Homo sapiens GN=AFM PE=1 SV=1                                                 | HNFSHCCSKVDAQRR                       |
| AFAM_HUMAN  | Afamin OS=Homo sapiens GN=AFM PE=1 SV=1                                                 | FNETTEKSLKMVQQUECK                    |
| ANT3_HUMAN  | Antithrombin-III OS=Homo sapiens GN=SERPINC1 PE=1 SV=1                                  | AAINKWVSNK                            |
| ANT3_HUMAN  | Antithrombin-III OS=Homo sapiens GN=SERPINC1 PE=1 SV=1                                  | LGACNDTLQQLMEVFK                      |
| ANT3_HUMAN  | Antithrombin-III OS=Homo sapiens GN=SERPINC1 PE=1 SV=1                                  | LGACNDTLQQLMEVFKFDTI<br>SEK           |
| ANT3_HUMAN  | Antithrombin-III OS=Homo sapiens GN=SERPINC1 PE=1 SV=1                                  | ENAEQSRAAINKWVSNK                     |
| APOB_HUMAN  | Apolipoprotein B-100 OS=Homo sapiens GN=APOB PE=1 SV=1                                  | NLTDFAEQYSIQDWAKRMK                   |
| APOB_HUMAN  | Apolipoprotein B-100 OS=Homo sapiens GN=APOB PE=1 SV=1                                  | HLRVNQNLVYESGSLNFSK                   |
| APOB_HUMAN  | Apolipoprotein B-100 OS=Homo sapiens GN=APOB PE=1 SV=1                                  | PTVSSSMEFKYDFNSSMLYST<br>AK           |
| APOB_HUMAN  | Apolipoprotein B-100 OS=Homo sapiens GN=APOB PE=1 SV=1                                  | AEEEMLENVSLVCPK                       |
| APOB_HUMAN  | Apolipoprotein B-100 OS=Homo sapiens GN=APOB PE=1 SV=1                                  | QVLFLDVTYVGN CSTHFTVK                 |
| APOB_HUMAN  | Apolipoprotein B-100 OS=Homo sapiens GN=APOB PE=1 SV=1                                  | TIHDLHLFIENIDFNK                      |
| APOB_HUMAN  | Apolipoprotein B-100 OS=Homo sapiens GN=APOB PE=1 SV=1                                  | ELCTISHIFIPAMGNITYDFS<br>K            |
| APOB_HUMAN  | Apolipoprotein B-100 OS=Homo sapiens GN=APOB PE=1 SV=1                                  | LNGESNLRFNSSYLQGTNQIT<br>GR           |
| APOD_HUMAN  | Apolipoprotein D OS=Homo sapiens GN=APOD PE=1 SV=1                                      | CPNPPVQENFDVVK                        |
| APOD_HUMAN  | Apolipoprotein D OS=Homo sapiens GN=APOD PE=1 SV=1                                      | CIQANYSLMENGKIK                       |
| APOD_HUMAN  | Apolipoprotein D OS=Homo sapiens GN=APOD PE=1 SV=1                                      | ADGTVNQIEGEATPVNLTEP<br>AKLEVK        |
| APOE_HUMAN  | Apolipoprotein E OS=Homo sapiens GN=APOE PE=1 SV=1                                      | VQAAVGTSAAPVPSDNH                     |
| APOH_HUMAN  | Beta-2-glycoprotein 1 OS=Homo sapiens GN=APOH PE=1 SV=3                                 | PSAGNNSLYR                            |
| APOH_HUMAN  | Beta-2-glycoprotein 1 OS=Homo sapiens GN=APOH PE=1 SV=3                                 | LGNWSAMPSCASCK                        |
| APOH_HUMAN  | Beta-2-glycoprotein 1 OS=Homo sapiens GN=APOH PE=1 SV=3                                 | DTAVFECLPQHAMFGNDTIT<br>CTTHGNWTK     |
| AT1B3_HUMAN | Sodium/potassium-transporting ATPase subunit beta-3 OS=Homo sapiens GN=ATP1B3 PE=1 SV=1 | KSLNQSLAEWK                           |

|             |                                                                                                            |                                                                                                                 |
|-------------|------------------------------------------------------------------------------------------------------------|-----------------------------------------------------------------------------------------------------------------|
| AT1B3_HUMAN | Sodium/potassium-transporting ATPase subunit beta-3<br>OS=Homo sapiens GN=ATP1B3 PE=1 SV=1                 | PYTL <sup>EE</sup> QK <sup>N</sup> LTVC <sup>D</sup> GALFEQK                                                    |
| ATS20_HUMAN | A disintegrin and metalloproteinase with thrombospondin motifs 20<br>OS=Homo sapiens GN=ADAMTS20 PE=2 SV=2 | KLED <sup>T</sup> N <sup>C</sup> SQVQK <sup>P</sup> PTHK                                                        |
| ATS20_HUMAN | A disintegrin and metalloproteinase with thrombospondin motifs 20<br>OS=Homo sapiens GN=ADAMTS20 PE=2 SV=2 | CPQGQFS <sup>I</sup> N <sup>L</sup> SGTGMKISSTAK                                                                |
| C1R_HUMAN   | Complement C1r subcomponent<br>OS=Homo sapiens GN=C1R PE=1 SV=2                                            | MLL <sup>T</sup> FHTDFS <sup>N</sup> EEN <sup>G</sup> TIMFY                                                     |
| C1R_HUMAN   | Complement C1r subcomponent<br>OS=Homo sapiens GN=C1R PE=1 SV=2                                            | EHEAQSN <sup>A</sup> SLDVFLGHTNVEELMK                                                                           |
| C1R_HUMAN   | Complement C1r subcomponent<br>OS=Homo sapiens GN=C1R PE=1 SV=2                                            | RSYPPDLRC <sup>N</sup> YSIRVER                                                                                  |
| CERU_HUMAN  | Ceruloplasmin<br>OS=Homo sapiens GN=CP PE=1 SV=1                                                           | ELHHLQE <sup>Q</sup> N <sup>V</sup> SNAFLDK                                                                     |
| CERU_HUMAN  | Ceruloplasmin<br>OS=Homo sapiens GN=CP PE=1 SV=1                                                           | AGLQAFFQVQE <sup>C</sup> N <sup>K</sup> SSSK                                                                    |
| CERU_HUMAN  | Ceruloplasmin<br>OS=Homo sapiens GN=CP PE=1 SV=1                                                           | EHEGAIYPD <sup>N</sup> TTDFQRADDK                                                                               |
| CERU_HUMAN  | Ceruloplasmin<br>OS=Homo sapiens GN=CP PE=1 SV=1                                                           | EN <sup>L</sup> TAPGSDSAV <sup>F</sup> FEQGTTR                                                                  |
| CERU_HUMAN  | Ceruloplasmin<br>OS=Homo sapiens GN=CP PE=1 SV=1                                                           | EFYLFPTV <sup>F</sup> DEN <sup>E</sup> SLLEDNIR                                                                 |
| CERU_HUMAN  | Ceruloplasmin<br>OS=Homo sapiens GN=CP PE=1 SV=1                                                           | DVDKEFYLFPTV <sup>F</sup> DEN <sup>E</sup> SLLEDNIR                                                             |
| CFAH_HUMAN  | Complement factor H<br>OS=Homo sapiens GN=CFH PE=1 SV=4                                                    | SPDV <sup>I</sup> NGSPISQK                                                                                      |
| CFAH_HUMAN  | Complement factor H<br>OS=Homo sapiens GN=CFH PE=1 SV=4                                                    | DGRWQSIPLC <sup>V</sup> EKIPCSQPPQIEHG <sup>T</sup> IN <sup>S</sup> SR                                          |
| CFAH_HUMAN  | Complement factor H<br>OS=Homo sapiens GN=CFH PE=1 SV=4                                                    | WDPEV <sup>N</sup> C <sup>S</sup> MAQIQLC <sup>P</sup> PPPQIPNSH <sup>N</sup> M <sup>T</sup> TLN <sup>Y</sup> R |
| CFAH_HUMAN  | Complement factor H<br>OS=Homo sapiens GN=CFH PE=1 SV=4                                                    | SPYEMFGDEE <sup>V</sup> MCLNG <sup>N</sup> WT <sup>E</sup> PPQCK                                                |
| CLUS_HUMAN  | Clusterin<br>OS=Homo sapiens GN=CLU PE=1 SV=1                                                              | EILSVDCST <sup>N</sup> N <sup>P</sup> SQAK                                                                      |
| CLUS_HUMAN  | Clusterin<br>OS=Homo sapiens GN=CLU PE=1 SV=1                                                              | EDAL <sup>N</sup> ETRESE <sup>T</sup> KLK                                                                       |
| CLUS_HUMAN  | Clusterin<br>OS=Homo sapiens GN=CLU PE=1 SV=1                                                              | ELPGVC <sup>N</sup> ETMMALWEECK                                                                                 |
| CLUS_HUMAN  | Clusterin<br>OS=Homo sapiens GN=CLU PE=1 SV=1                                                              | ML <sup>N</sup> TSSLLEQLNEQFNW <sup>V</sup> SR                                                                  |
| CO3_HUMAN   | Complement C3<br>OS=Homo sapiens GN=C3 PE=1 SV=2                                                           | TVLTPATNHMG <sup>N</sup> V <sup>T</sup> FTIPANREFK                                                              |
| CO3_HUMAN   | Complement C3<br>OS=Homo sapiens GN=C3 PE=1 SV=2                                                           | SYTVAIAGYALAQMGR <sup>L</sup> KGPLLN <sup>K</sup>                                                               |
| CO4A_HUMAN  | Complement C4-A<br>OS=Homo sapiens GN=C4A PE=1 SV=1                                                        | FSDGLES <sup>N</sup> SSTQFEVKK                                                                                  |
| CO4A_HUMAN  | Complement C4-A<br>OS=Homo sapiens GN=C4A PE=1 SV=1                                                        | GL <sup>N</sup> V <sup>T</sup> LSSTGR                                                                           |
| CO4A_HUMAN  | Complement C4-A<br>OS=Homo sapiens GN=C4A PE=1 SV=1                                                        | GL <sup>N</sup> V <sup>T</sup> LSSTGRNGFKSHALQLN <sup>N</sup> R                                                 |
| FETUA_HUMAN | Alpha-2-HS-glycoprotein<br>OS=Homo sapiens GN=AHSG PE=1 SV=1                                               | VCQDCPLLAPL <sup>N</sup> DTR                                                                                    |
| FETUA_HUMAN | Alpha-2-HS-glycoprotein<br>OS=Homo sapiens GN=AHSG PE=1 SV=1                                               | AALAAFNAQ <sup>N</sup> NGSN <sup>F</sup> QLEEISR                                                                |

|             |                                                                             |                                                          |
|-------------|-----------------------------------------------------------------------------|----------------------------------------------------------|
| FETUA_HUMAN | Alpha-2-HS-glycoprotein OS=Homo sapiens GN=AHSG PE=1 SV=1                   | VCQDCPLLAPLNDTRVVHAAK                                    |
| FINC_HUMAN  | Fibronectin OS=Homo sapiens GN=FN1 PE=1 SV=3                                | DQCIVDDITYNVNDTFHK                                       |
| FINC_HUMAN  | Fibronectin OS=Homo sapiens GN=FN1 PE=1 SV=3                                | HEEGHMLNCTCFGQGR                                         |
| FINC_HUMAN  | Fibronectin OS=Homo sapiens GN=FN1 PE=1 SV=3                                | HEEGHMLNCTCFGQGRGR                                       |
| FINC_HUMAN  | Fibronectin OS=Homo sapiens GN=FN1 PE=1 SV=3                                | LDAPTNLQFVN <sup>U</sup> ETDSTVLVR                       |
| FINC_HUMAN  | Fibronectin OS=Homo sapiens GN=FN1 PE=1 SV=3                                | GGNSNGALCHFPFLYNNHNYTDCTSEGR                             |
| GP115_HUMAN | Probable G-protein coupled receptor 115 OS=Homo sapiens GN=GPR115 PE=2 SV=2 | SRAAENASLGPTNGSK                                         |
| GP115_HUMAN | Probable G-protein coupled receptor 115 OS=Homo sapiens GN=GPR115 PE=2 SV=2 | SRAAENASLGPTNGSKLMNR                                     |
| GP115_HUMAN | Probable G-protein coupled receptor 115 OS=Homo sapiens GN=GPR115 PE=2 SV=2 | GFHINHNTSEKSLNFSMSMNNTTEDILGMVQIPR                       |
| GP115_HUMAN | Probable G-protein coupled receptor 115 OS=Homo sapiens GN=GPR115 PE=2 SV=2 | SSETTSGNIAFIVELLKN <sup>I</sup> STD LSDN <sup>V</sup> TR |
| GP115_HUMAN | Probable G-protein coupled receptor 115 OS=Homo sapiens GN=GPR115 PE=2 SV=2 | N <sup>I</sup> STD LSDN <sup>V</sup> TREK                |
| GP115_HUMAN | Probable G-protein coupled receptor 115 OS=Homo sapiens GN=GPR115 PE=2 SV=2 | CEGPCISSSNCSQPCA                                         |
| GP115_HUMAN | Probable G-protein coupled receptor 115 OS=Homo sapiens GN=GPR115 PE=2 SV=2 | N <sup>A</sup> SSDLLQSVNLFAR                             |
| HEMO_HUMAN  | Hemopexin OS=Homo sapiens GN=HPX PE=1 SV=2                                  | GHGHRNGTGHGNSTHHGPEYMR                                   |
| HEMO_HUMAN  | Hemopexin OS=Homo sapiens GN=HPX PE=1 SV=2                                  | SWPAVGN <sup>C</sup> SSALRWLGR                           |
| HPT_HUMAN   | Haptoglobin OS=Homo sapiens GN=HP PE=1 SV=1                                 | KQLVEIEKVVLHPNYSQVDI GLIK                                |
| HPT_HUMAN   | Haptoglobin OS=Homo sapiens GN=HP PE=1 SV=1                                 | NLFLN <sup>H</sup> SENATAK                               |
| HRG_HUMAN   | Histidine-rich glycoprotein OS=Homo sapiens GN=HRG PE=1 SV=1                | HSHNNSSDLHPHK                                            |
| IGHA1_HUMAN | Ig alpha-1 chain C region OS=Homo sapiens GN=IGHA1 PE=1 SV=2                | PALEDLLLGSEAN <sup>L</sup> TCTLTGLR                      |
| IGHA2_HUMAN | Ig alpha-2 chain C region OS=Homo sapiens GN=IGHA2 PE=1 SV=3                | TPLTANITKSGN <sup>T</sup> FR                             |
| IGHA2_HUMAN | Ig alpha-2 chain C region OS=Homo sapiens GN=IGHA2 PE=1 SV=3                | PALEDLLLGSEAN <sup>L</sup> TCTLTGLR                      |
| IGHA2_HUMAN | Ig alpha-2 chain C region OS=Homo sapiens GN=IGHA2 PE=1 SV=3                | HYTNPSQDVTVP <sup>C</sup> VPVPPPPPCCHPR                  |
| IGHG1_HUMAN | Ig gamma-1 chain C region OS=Homo sapiens GN=IGHG1 PE=1 SV=1                | EEQYN <sup>S</sup> TYR                                   |
| IGHG1_HUMAN | Ig gamma-1 chain C region OS=Homo sapiens GN=IGHG1 PE=1 SV=1                | FNWYVDGVEVHNAKTKPREEQYN <sup>S</sup> TYR                 |
| IGHG2_HUMAN | Ig gamma-2 chain C region OS=Homo sapiens GN=IGHG2 PE=1 SV=2                | EEQFN <sup>S</sup> TFR                                   |
| IGHG3_HUMAN | Ig gamma-3 chain C region OS=Homo sapiens GN=IGHG3 PE=1 SV=2                | EEQYN <sup>S</sup> TFR                                   |
| IGHM_HUMAN  | Ig mu chain C region OS=Homo sapiens GN=IGHM PE=1 SV=3                      | N <sup>N</sup> SDISSTRGFPSVLR                            |



|             |                                                                                 |                                  |
|-------------|---------------------------------------------------------------------------------|----------------------------------|
| IGHM_HUMAN  | Ig mu chain C region OS=Homo sapiens GN=IGHM PE=1 SV=3                          | VDHRGLTFQQNASSMCVDPQDTAIR        |
| IGHM_HUMAN  | Ig mu chain C region OS=Homo sapiens GN=IGHM PE=1 SV=3                          | PTLYNVSLVMSDTAGTCY               |
| IGHM_HUMAN  | Ig mu chain C region OS=Homo sapiens GN=IGHM PE=1 SV=3                          | THTNISESHPNATFSAVGEASICEDDWNSGER |
| ITIH1_HUMAN | Inter-alpha-trypsin inhibitor heavy chain H1 OS=Homo sapiens GN=ITIH1 PE=1 SV=3 | ICDLLVANNNHFAHFFAPQNLTNMNK       |
| ITIH2_HUMAN | Inter-alpha-trypsin inhibitor heavy chain H2 OS=Homo sapiens GN=ITIH2 PE=1 SV=2 | GAFISNFSMTVDGK                   |
| ITIH2_HUMAN | Inter-alpha-trypsin inhibitor heavy chain H2 OS=Homo sapiens GN=ITIH2 PE=1 SV=2 | VVNNSPQPQNVVFDVQIPK              |
| KLKB1_HUMAN | Plasma kallikrein OS=Homo sapiens GN=KLKB1 PE=1 SV=1                            | TSTRIVGGTNSSWGEPWQVSLQVK         |
| KLKB1_HUMAN | Plasma kallikrein OS=Homo sapiens GN=KLKB1 PE=1 SV=1                            | IYPGVDFGGEELNVTFVK               |
| KLOTB_HUMAN | Beta-klotho OS=Homo sapiens GN=KLB PE=1 SV=1                                    | AIWSKNPNFTPVNESQLFLYDTFPK        |
| KLOTB_HUMAN | Beta-klotho OS=Homo sapiens GN=KLB PE=1 SV=1                                    | NVSSTNGSSDSYIFLEK                |
| KLOTB_HUMAN | Beta-klotho OS=Homo sapiens GN=KLB PE=1 SV=1                                    | GWLSITLGSHWIEPNR                 |
| KLOTB_HUMAN | Beta-klotho OS=Homo sapiens GN=KLB PE=1 SV=1                                    | YGGWKNDTIIDIFNDYATYCFQMFGDR      |
| KLOTB_HUMAN | Beta-klotho OS=Homo sapiens GN=KLB PE=1 SV=1                                    | MGQNVSLNLRALNWK                  |
| KLOTB_HUMAN | Beta-klotho OS=Homo sapiens GN=KLB PE=1 SV=1                                    | SGNDTYGAAHNLLVAHALAWR            |
| KNG1_HUMAN  | Kininogen-1 OS=Homo sapiens GN=KNG1 PE=1 SV=2                                   | YNSQNSNNQFVLYR                   |
| KV104_HUMAN | Ig kappa chain V-I region CAR OS=Homo sapiens PE=1 SV=1                         | ASQNISSWLAWYQQKPGK               |
| PLMN_HUMAN  | Plasminogen OS=Homo sapiens GN=PLG PE=1 SV=2                                    | GNVAVTVSGHTCQHWSAQTPTHNR         |
| PON1_HUMAN  | Serum paraoxonase/arylesterase 1 OS=Homo sapiens GN=PON1 PE=1 SV=2              | VVAEGFDFANGINISPDGKYVYIAELLAHK   |
| THRB_HUMAN  | Prothrombin OS=Homo sapiens GN=F2 PE=1 SV=2                                     | GHVNITR                          |
| THRB_HUMAN  | Prothrombin OS=Homo sapiens GN=F2 PE=1 SV=2                                     | YPHKPEINSTTHPGADLQENFCR          |
| THRB_HUMAN  | Prothrombin OS=Homo sapiens GN=F2 PE=1 SV=2                                     | NFTENDLLVRIGK                    |
| TRFE_HUMAN  | Serotransferrin OS=Homo sapiens GN=TF PE=1 SV=2                                 | ILRQQHFLFGSNVTDCSGNFCLFR         |

**Appendix I. Matched sequence of BSA tryptic digest by 80% ACN containing 1% H<sub>3</sub>PO<sub>4</sub> washing for the first time**

Matched peptides shown in **bold red**.

|     |                   |                    |                    |                    |                    |
|-----|-------------------|--------------------|--------------------|--------------------|--------------------|
| 1   | MKWVTFISLL        | LLFSSAYSRG         | VFRRDTHKSE         | IAHR <b>FKDLGE</b> | <b>EHFKGLVLIA</b>  |
| 51  | FSQYLQQCPF        | DEHVK <b>LVNEL</b> | <b>TEFAK</b> TCVAD | ESHAGCEK <b>SL</b> | <b>HTLFGDELCK</b>  |
| 101 | VASLRETYGD        | MADCCEKQEP         | ERNECFLSHK         | DDSPDLPK <b>LK</b> | <b>PDPNTLCDEF</b>  |
| 151 | <b>KADEKKFWGK</b> | <b>YLVEIARRHP</b>  | YFYAPPELLYY        | ANKYNGVFQE         | CCQAEDKGAC         |
| 201 | LLPKIETMRE        | KVLASSARQR         | LRCASIQKFG         | ERALK <b>AWSVA</b> | <b>RLSQKFPKAE</b>  |
| 251 | <b>FVEVTKLVTD</b> | LTKVHKECCH         | GDLLECADDR         | ADLAKY <b>ICDN</b> | <b>QDTISSKLKE</b>  |
| 301 | <b>CCDKPLLEKS</b> | HCIAEVEKDA         | IPENLPPLTA         | DFAEDKDVCK         | NYQEAK <b>DAFL</b> |
| 351 | <b>GSFLYEYSRR</b> | <b>HPEYAVSVLL</b>  | <b>RLAKEYEATL</b>  | <b>EECCA</b> KDDPH | <b>ACYSTVFDKL</b>  |
| 401 | <b>KHLVDEPQNL</b> | <b>IKQNCDQFEK</b>  | <b>LGEYGFQNAL</b>  | <b>IVRYTRKVPQ</b>  | <b>VSTPTLVEVS</b>  |
| 451 | <b>RSLGKVGTRC</b> | CTKPESER <b>MP</b> | <b>CTEDYLSLIL</b>  | <b>NRLCVLHEKT</b>  | <b>PVSEKVTKCC</b>  |
| 501 | <b>TESLVNRRPC</b> | <b>FSALTPDETY</b>  | <b>VPKAFDEKLF</b>  | <b>TFHADICTLP</b>  | <b>DTEKQIKKQT</b>  |
| 551 | <b>ALVELLKHKP</b> | <b>KATEEQLKTV</b>  | <b>MENFVAFVDK</b>  | CCAADDKEAC         | FAVEGPKLVV         |
| 601 | STQTALA           |                    |                    |                    |                    |

## Appendix II. Matched sequence of BSA tryptic digest by 80% ACN containing 1% H<sub>3</sub>PO<sub>4</sub>

washing for the second time

Matched peptides shown in **bold red**.

|     |                   |                    |                    |                    |                    |
|-----|-------------------|--------------------|--------------------|--------------------|--------------------|
| 1   | MKWVTFISLL        | LLFSSAYSRG         | VFRRDTHKSE         | IAHR <b>FKDLGE</b> | <b>EHFKGLVLIA</b>  |
| 51  | FSQYLQQCPF        | DEHVK <b>LVNEL</b> | <b>TEFAK</b> TCVAD | ESHAGCEK <b>SL</b> | <b>HTLFGDELCK</b>  |
| 101 | VASLRETYGD        | MADCCEKQEP         | ERNECFLSHK         | DDSPDLPK <b>LK</b> | <b>PDPNTLCDEF</b>  |
| 151 | <b>KADEKKFWGK</b> | <b>YLVEIARRHP</b>  | <b>YFYAPPELLYY</b> | <b>ANKYNGVFQE</b>  | CCQAEDKGAC         |
| 201 | LLPKIETMRE        | KVLASSARQR         | LRCASIQKFG         | ERALK <b>AWSVA</b> | <b>RLSQKFPKAE</b>  |
| 251 | <b>FVEVTKLVTD</b> | LTKVHKECCH         | <b>GDLLECADDR</b>  | ADLAKY <b>ICDN</b> | <b>QDTISSKLKE</b>  |
| 301 | <b>CCDKPLLEKS</b> | HCIAEVEKDA         | IPENLPPLTA         | DFAEDKDVCK         | NYQEAK <b>DAFL</b> |
| 351 | <b>GSFLYEYSRR</b> | <b>HPEYAVSVLL</b>  | <b>RLAKEYEATL</b>  | <b>EECCA</b> KDDPH | <b>ACYSTVFDKL</b>  |
| 401 | <b>KHLVDEPQNL</b> | <b>IKQNCDQFEK</b>  | <b>LGEYGFQNAL</b>  | <b>IVRYTRKVPQ</b>  | <b>VSTPTLVEVS</b>  |
| 451 | <b>RSLGKVGTRC</b> | CTKPESER <b>MP</b> | <b>CTEDYLSLIL</b>  | <b>NRLCVLHEKT</b>  | <b>PVSEKVTKCC</b>  |
| 501 | <b>TESLVNRRPC</b> | <b>FSALTPDETY</b>  | <b>VPKAFDEKLF</b>  | <b>TFHADICTLP</b>  | <b>DTEKQIKKQT</b>  |
| 551 | <b>ALVELLKHKP</b> | <b>KATEEQLKTV</b>  | <b>MENFVAFVDK</b>  | CCAADDKEAC         | FAVEGPKLVV         |
| 601 | STQTALA           |                    |                    |                    |                    |

## References

S1. D. Jiang, L. L. Keenan, A. D. Burrows and K. J. Edler, *Chem. Commun.*, 2012, **48**, 12053-12055.
